# Supplementary material for: Cocreation across Spaces of Uncertainty: Interdisciplinary Research and Collaborative Learning
Source: Oxford University Press journal article supplement (doi:10.1162/leon_a_01697), 2018-09-18
Supplement: 533-clements-esupp3.pdf [file 533-clements-esupp3.pdf]

## Module Assessment

### Assessment rationale

Due to the high level of risk attached to collaborative research across disciplines and the variety of research outcomes to be produced, assessment was based more on process rather than product. Two individual assignments were designed which reflect on the processes of collaboration, research and experimentation undertaken. The assessments were a Research & Production Journal and a Critical Evaluation.

### **1. Research & Production Journal: 70% (individual)**

Consisting of:

- a) **Online research journal**: The project used an online social networking site (Ning) for all correspondence and to support collaborations and projects. All network activity (posted by the end of the module) was looked at in the assessment of the Research and Production Journal, including: individual blog posts, shared research, ideas generated, sub-group activity, and contribution to discussions.
- b) **Project work**: Depending on the nature of the project, students were also allowed to submit a physical piece of work, an artwork / artefact / piece of research and / or supporting material. This was handed-in during the final session of the module and was reviewed alongside the online evidence of research.
- c) **A short research statement**

### **2. Critical Evaluation: 30% (individual)**

Students produced a written critical evaluation of between 1200 - 1500 words, evaluating different aspects of the project, including the approaches to research, collaboration and experimentation; the experience of interdisciplinary collaboration; and an assessment of the work produced.

### **Assessment criteria:**

*Research & Production Journal* was assessed on:

- quality and range of sources accessed in research
- documentation of research methods and experimentation
- evidence of engagement with interdisciplinary exchange
- engagement with other disciplines
- generating and developing ideas that make connections between art and science

*Critical Evaluation* was assessed on:

- critical evaluation of independent research undertaken
- understanding of proposed context for research outcomes
- individual contribution to collaborative project work

All work was double marked by both an 'arts' and 'science' based tutor. A moderation meeting, attended by all tutors, was held to agree final marks for each assessment.
